# Supplementary material for: The Signaling Pathways Project: an integrated ‘omics knowledgebase for mammalian cellular signaling pathways
Source: bioRxiv or medRxiv preprint supplement (doi:10.1101/401729), 2019-06-03
Supplement: Supplementary file [file 401729-1.pdf]

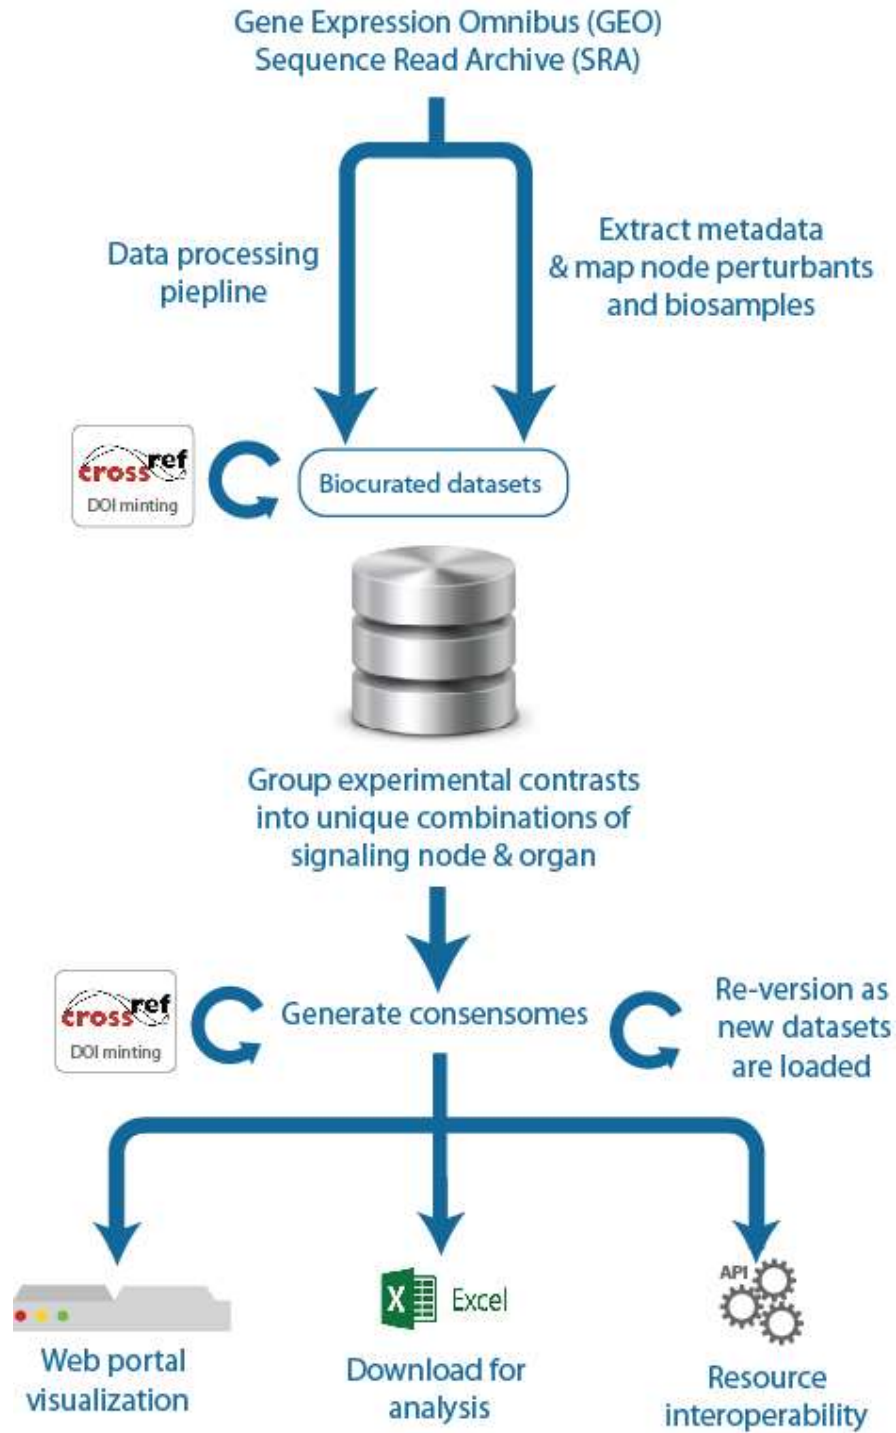

**Supplementary Figure 1. Overview of biocuration strategy.**
