# Supplementary material for: The Signaling Pathways Project: an integrated ‘omics knowledgebase for mammalian cellular signaling pathways
Source: bioRxiv or medRxiv preprint supplement (doi:10.1101/401729), 2019-06-03
Supplement: Supplementary file [file 401729-5.pdf]

**Supplementary Table 1:** Examples of signaling pathway module hierarchies in the SPP knowledgebase

| Signaling Pathway Module |                                            |                      |                    | Bioactive small molecule (BSM) |         |                   |                   |
|--------------------------|--------------------------------------------|----------------------|--------------------|--------------------------------|---------|-------------------|-------------------|
| Category                 | Class                                      | Family               | Node               | Ligand                         | Drug    | Synthetic organic | Natural substance |
| Receptors                | G protein-coupled                          | Adrenoreceptors      | ADRB1              | EPI                            | ISOPREN | -                 | -                 |
|                          | Catalytic                                  | EGF receptors        | EGFR               | EGF                            | GEFIT   | WZ002             | -                 |
|                          | Nuclear                                    | PPARs                | PPARG              | LINO                           | ROSI    | GW544             |                   |
| Enzymes                  | Deacetylases                               | Histone deacetylases | HDAC3              |                                | VORIN   |                   | BUTYR             |
|                          |                                            | Kinases              | Abl family kinases | ABL1                           | -       | IMAT              | ZINC498           |
|                          | Cyclases                                   | Adenylyl cyclases    | ADCY3              | -                              | -       |                   | FORSK             |
| Transcription Factors    | Basic leucine zipper Forkhead/winged helix | CREB-like factors    | CREB1              |                                |         |                   |                   |
|                          |                                            | FOXM                 | FOXM1              |                                | -       |                   | THSP              |
| Co-nodes                 | Heat shock proteins                        | HSP 90 proteins      | HSP90AA1           |                                |         |                   | GEDUN             |
