# Supplementary material for: The Signaling Pathways Project: an integrated ‘omics knowledgebase for mammalian cellular signaling pathways
Source: bioRxiv or medRxiv preprint supplement (doi:10.1101/401729), 2019-06-03
Supplement: Supplementary file [file 401729-6.pdf]

**Supplementary Table S2.** Literature and ChIP-Seq cross-validation of top-ranked consensome targets. AR-Hs-All: Androgen receptor human all organs; ER-Hs-All: Estrogen receptors human all organs; GR-Hs-All: Glucocorticoid receptor human all organs; PPARs-Mm-Metabolic: Peroxisome proliferator activated receptors-mouse-metabolic organs; CC, percentile ranking for target in the cistromic/ChIP-Seq consensome.

| Consensome | Target                 | Reference | CC | Consensome         | Target          | References | CC                                                 |
|------------|------------------------|-----------|----|--------------------|-----------------|------------|----------------------------------------------------|
| AR-Hs-All  | <i>ZBTB16 (PLZF)</i>   | [1]       | 81 | ERs-Hs-All         | <i>SGK1</i>     | [2]        | 88                                                 |
|            | <i>UAP1</i>            | [3]       | 99 |                    | <i>TPD52L1</i>  | -          | 99                                                 |
|            | <i>KLK3 (PSA)</i>      | [4]       | 99 |                    | <i>SIAH2</i>    | [5]        | 99                                                 |
|            | <i>MBOAT2</i>          | [6]       | 99 |                    | <i>IGFBP4</i>   | [7]        | 99                                                 |
|            | <i>C5orf30</i>         | -         | 40 |                    | <i>PRSS23</i>   | [8]        | 97                                                 |
|            | <i>C1orf116 (SARG)</i> | [9]       | 99 |                    | <i>HSPB8</i>    | [10]       | 99                                                 |
|            | <i>ATAD2</i>           | [11]      | 99 |                    | <i>IL17RB</i>   | [12]       | 97                                                 |
|            | <i>HOMER2</i>          | [13]      | 65 |                    | <i>EFNA1</i>    | [14]       | 99                                                 |
|            | <i>FKBP5</i>           | [15]      | 99 |                    | <i>SLC7A5</i>   | [16]       | 99                                                 |
|            | <i>ENDOD1</i>          | [17]      | 99 |                    | <i>SLC9A3R1</i> | -          | 99                                                 |
|            | <i>PTGER4 (EP4)</i>    | [18]      | 93 | <i>TIPARP</i>      | [19]            | 99         |                                                    |
| GR-Hs-All  | <i>TSC22D3</i>         | [20]      | 99 | PPARs-Mm-Metabolic | <i>Slc25a20</i> | [21]       | 93 <sup>rd</sup> (Ppara), 99 <sup>th</sup> (Pparg) |
|            | <i>FKBP5</i>           | [22]      | 99 |                    | <i>Pdk4</i>     | [23]       | 96 <sup>th</sup> (Ppar), 92 <sup>nd</sup> (Ppar)   |
|            | <i>ACSL1</i>           | -         | 99 |                    | <i>Retsat</i>   | [24]       | 79 <sup>th</sup> (Ppara), 96 <sup>th</sup> (Pparg) |
|            | <i>IER3</i>            | -         | 92 |                    | <i>Hsd12</i>    | [25]       | 94 <sup>th</sup> (Ppara), 97 <sup>th</sup> (Pparg) |
|            | <i>SGK1</i>            |           | 97 |                    | <i>Acs1</i>     | [26]       | 99 <sup>th</sup> (Ppara), 99 <sup>th</sup> (Pparg) |
|            | <i>PLK2</i>            | [27]      | 66 |                    | <i>Crat</i>     | [28]       | 98 <sup>th</sup> (Ppara), 97 <sup>th</sup> (Pparg) |
|            | <i>ZFP36</i>           | [29]      | 99 |                    | <i>Ech1</i>     | [30]       | 99 <sup>th</sup> (Ppara), 99 <sup>th</sup> (Pparg) |
|            | <i>NNMT</i>            | -         | 93 |                    | <i>Ehhadh</i>   | [30]       | 99 <sup>th</sup> (Ppara), 92 <sup>nd</sup> (Pparg) |
|            | <i>BIRC3</i>           |           | 98 |                    | <i>Acadl</i>    | -          | 99 <sup>th</sup> (Ppara), 99 <sup>th</sup> (Pparg) |
|            | <i>LMCD1</i>           | -         | 79 |                    | <i>Eci1</i>     | [31]       | 98 <sup>th</sup> (Ppara), 97 <sup>th</sup> (Pparg) |

## REFERENCES

1. Jiang F, Wang Z. Identification and characterization of PLZF as a prostatic androgen-responsive gene. *The Prostate*. 2004;59(4):426-35. doi: 10.1002/pros.20000. PubMed PMID: 15065091.
2. Shanmugam I, Cheng G, Terranova PF, Thrasher JB, Thomas CP, Li B. Serum/glucocorticoid-induced protein kinase-1 facilitates androgen receptor-dependent cell survival. *Cell death and differentiation*. 2007;14(12):2085-94. doi: 10.1038/sj.cdd.4402227. PubMed PMID: 17932503.
3. Itkonen HM, Engedal N, Babaie E, Luhr M, Guldvik IJ, Minner S, et al. UAP1 is overexpressed in prostate cancer and is protective against inhibitors of N-linked glycosylation. *Oncogene*. 2015;34(28):3744-50. doi: 10.1038/onc.2014.307. PubMed PMID: 25241896.
4. Kim J, Coetzee GA. Prostate specific antigen gene regulation by androgen receptor. *Journal of cellular biochemistry*. 2004;93(2):233-41. doi: 10.1002/jcb.20228. PubMed PMID: 15368351.
5. Frasor J, Danes JM, Funk CC, Katzenellenbogen BS. Estrogen down-regulation of the corepressor N-CoR: mechanism and implications for estrogen derepression of N-CoR-regulated genes. *Proceedings of the National Academy of Sciences of the United States of America*. 2005;102(37):13153-7. doi: 10.1073/pnas.0502782102. PubMed PMID: 16141343; PubMed Central PMCID: PMC1201577.
6. Han W, Gao S, Barrett D, Ahmed M, Han D, Macoska JA, et al. Reactivation of androgen receptor-regulated lipid biosynthesis drives the progression of castration-resistant prostate cancer. *Oncogene*. 2017. Epub 2017/10/24. doi: 10.1038/onc.2017.385. PubMed PMID: 29059155.
7. Wang DY, Fulthorpe R, Liss SN, Edwards EA. Identification of estrogen-responsive genes by complementary deoxyribonucleic acid microarray and characterization of a novel early estrogen-induced gene: EEIG1. *Molecular endocrinology*. 2004;18(2):402-11. doi: 10.1210/me.2003-0202. PubMed PMID: 14605097.
8. Chan HS, Chang SJ, Wang TY, Ko HJ, Lin YC, Lin KT, et al. Serine protease PRSS23 is upregulated by estrogen receptor alpha and associated with proliferation of breast cancer cells. *PloS one*. 2012;7(1):e30397. doi: 10.1371/journal.pone.0030397. PubMed PMID: 22291950; PubMed Central PMCID: PMC3264607.
9. Steketee K, Ziel-van der Made AC, van der Korput HA, Houtsmuller AB, Trapman J. A bioinformatics-based functional analysis shows that the specifically androgen-regulated gene SARG contains an active direct repeat androgen response element in the first intron. *Journal of molecular endocrinology*. 2004;33(2):477-91. doi: 10.1677/jme.1.01478. PubMed PMID: 15525603.
10. Yang C, Trent S, Ionescu-Tiba V, Lan L, Shioda T, Sgroi D, et al. Identification of cyclin D1- and estrogen-regulated genes contributing to breast carcinogenesis and progression. *Cancer research*. 2006;66(24):11649-58. doi: 10.1158/0008-5472.CAN-06-1645. PubMed PMID: 17178859.
11. Duan Z, Zou JX, Yang P, Wang Y, Borowsky AD, Gao AC, et al. Developmental and androgenic regulation of chromatin regulators EZH2 and ANCCA/ATAD2 in the prostate Via MLL histone methylase complex. *The Prostate*. 2013;73(5):455-66. doi: 10.1002/pros.22587. PubMed PMID: 23038103.

12. Wang Z, Dahiya S, Provencher H, Muir B, Carney E, Coser K, et al. The prognostic biomarkers HOXB13, IL17BR, and CHDH are regulated by estrogen in breast cancer. *Clinical cancer research : an official journal of the American Association for Cancer Research*. 2007;13(21):6327-34. doi: 10.1158/1078-0432.CCR-07-0310. PubMed PMID: 17975144.
13. Kurmis AA, Yang F, Welch TR, Nickols NG, Dervan PB. A Pyrrole-Imidazole Polyamide Is Active against Enzalutamide-Resistant Prostate Cancer. *Cancer research*. 2017;77(9):2207-12. doi: 10.1158/0008-5472.CAN-16-2503. PubMed PMID: 28360139.
14. Andruska ND, Zheng X, Yang X, Mao C, Cherian MM, Mahapatra L, et al. Estrogen receptor alpha inhibitor activates the unfolded protein response, blocks protein synthesis, and induces tumor regression. *Proceedings of the National Academy of Sciences of the United States of America*. 2015;112(15):4737-42. doi: 10.1073/pnas.1403685112. PubMed PMID: 25825714; PubMed Central PMCID: PMC4403155.
15. Magee JA, Chang LW, Stormo GD, Milbrandt J. Direct, androgen receptor-mediated regulation of the FKBP5 gene via a distal enhancer element. *Endocrinology*. 2006;147(1):590-8. doi: 10.1210/en.2005-1001. PubMed PMID: 16210365.
16. Becker MA, Ibrahim YH, Cui X, Lee AV, Yee D. The IGF pathway regulates ERalpha through a S6K1-dependent mechanism in breast cancer cells. *Molecular endocrinology*. 2011;25(3):516-28. doi: 10.1210/me.2010-0373. PubMed PMID: 21292829; PubMed Central PMCID: PMC3045742.
17. Marques RB, Dits NF, Erkens-Schulze S, van Ijcken WF, van Weerden WM, Jenster G. Modulation of androgen receptor signaling in hormonal therapy-resistant prostate cancer cell lines. *PloS one*. 2011;6(8):e23144. doi: 10.1371/journal.pone.0023144. PubMed PMID: 21829708; PubMed Central PMCID: PMC3150397.
18. Terada N, Shimizu Y, Kamba T, Inoue T, Maeno A, Kobayashi T, et al. Identification of EP4 as a potential target for the treatment of castration-resistant prostate cancer using a novel xenograft model. *Cancer research*. 2010;70(4):1606-15. doi: 10.1158/0008-5472.CAN-09-2984. PubMed PMID: 20145136.
19. Kininis M, Chen BS, Diehl AG, Isaacs GD, Zhang T, Siepel AC, et al. Genomic analyses of transcription factor binding, histone acetylation, and gene expression reveal mechanistically distinct classes of estrogen-regulated promoters. *Molecular and cellular biology*. 2007;27(14):5090-104. doi: 10.1128/MCB.00083-07. PubMed PMID: 17515612; PubMed Central PMCID: PMC1951957.
20. D'Adamo F, Zollo O, Moraca R, Ayroldi E, Bruscoli S, Bartoli A, et al. A new dexamethasone-induced gene of the leucine zipper family protects T lymphocytes from TCR/CD3-activated cell death. *Immunity*. 1997;7(6):803-12. PubMed PMID: 9430225.
21. Tachibana K, Takeuchi K, Inada H, Yamasaki D, Ishimoto K, Tanaka T, et al. Regulation of the human SLC25A20 expression by peroxisome proliferator-activated receptor alpha in human hepatoblastoma cells. *Biochemical and biophysical research communications*. 2009;389(3):501-5. doi: 10.1016/j.bbrc.2009.09.018. PubMed PMID: 19748481.
22. U M, Shen L, Oshida T, Miyauchi J, Yamada M, Miyashita T. Identification of novel direct transcriptional targets of glucocorticoid receptor. *Leukemia*. 2004;18(11):1850-6. doi: 10.1038/sj.leu.2403516. PubMed PMID: 15385927.
23. Wu P, Peters JM, Harris RA. Adaptive increase in pyruvate dehydrogenase kinase 4 during starvation is mediated by peroxisome proliferator-activated receptor alpha. *Biochemical and biophysical research communications*. 2001;287(2):391-6. doi: 10.1006/bbrc.2001.5608. PubMed PMID: 11554740.

24. Schupp M, Lefterova MI, Janke J, Leitner K, Cristancho AG, Mullican SE, et al. Retinol saturase promotes adipogenesis and is downregulated in obesity. *Proceedings of the National Academy of Sciences of the United States of America*. 2009;106(4):1105-10. doi: 10.1073/pnas.0812065106. PubMed PMID: 19139408; PubMed Central PMCID: PMC2633572.
25. Adhikary T, Kaddatz K, Finkernagel F, Schonbauer A, Meissner W, Scharfe M, et al. Genomewide analyses define different modes of transcriptional regulation by peroxisome proliferator-activated receptor-beta/delta (PPARbeta/delta). *PloS one*. 2011;6(1):e16344. doi: 10.1371/journal.pone.0016344. PubMed PMID: 21283829; PubMed Central PMCID: PMC3023804.
26. Martin G, Schoonjans K, Lefebvre AM, Staels B, Auwerx J. Coordinate regulation of the expression of the fatty acid transport protein and acyl-CoA synthetase genes by PPARalpha and PPARgamma activators. *The Journal of biological chemistry*. 1997;272(45):28210-7. PubMed PMID: 9353271.
27. John S, Johnson TA, Sung MH, Biddie SC, Trump S, Koch-Paiz CA, et al. Kinetic complexity of the global response to glucocorticoid receptor action. *Endocrinology*. 2009;150(4):1766-74. doi: 10.1210/en.2008-0863. PubMed PMID: 19131569; PubMed Central PMCID: PMC2659280.
28. Kienesberger K, Pordes AG, Volk TG, Hofbauer R. L-carnitine and PPARalpha-agonist fenofibrate are involved in the regulation of Carnitine Acetyltransferase (CrAT) mRNA levels in murine liver cells. *BMC genomics*. 2014;15:514. doi: 10.1186/1471-2164-15-514. PubMed PMID: 24962334; PubMed Central PMCID: PMC4089027.
29. Smoak K, Cidlowski JA. Glucocorticoids regulate tristetraprolin synthesis and posttranscriptionally regulate tumor necrosis factor alpha inflammatory signaling. *Molecular and cellular biology*. 2006;26(23):9126-35. doi: 10.1128/MCB.00679-06. PubMed PMID: 16982682; PubMed Central PMCID: PMC1636823.
30. Reddy JK, Goel SK, Nemali MR, Carrino JJ, Laffler TG, Reddy MK, et al. Transcription regulation of peroxisomal fatty acyl-CoA oxidase and enoyl-CoA hydratase/3-hydroxyacyl-CoA dehydrogenase in rat liver by peroxisome proliferators. *Proceedings of the National Academy of Sciences of the United States of America*. 1986;83(6):1747-51. PubMed PMID: 3456610; PubMed Central PMCID: PMC323161.
31. Rakhshandehroo M, Knoch B, Muller M, Kersten S. Peroxisome proliferator-activated receptor alpha target genes. *PPAR research*. 2010;2010. doi: 10.1155/2010/612089. PubMed PMID: 20936127; PubMed Central PMCID: PMC2948931.
