# Supplementary material for: The Signaling Pathways Project: an integrated ‘omics knowledgebase for mammalian cellular signaling pathways
Source: bioRxiv or medRxiv preprint supplement (doi:10.1101/401729), 2019-06-03
Supplement: Supplementary file [file 401729-7.pdf]

**Supplementary Table S3.** Targets with elevated consensome rankings selected for bench validation

| <b>Consensome</b> | <b>Gene</b>    | <b>Name</b>                                          | <b>CPV</b> |
|-------------------|----------------|------------------------------------------------------|------------|
| ERs-Hs-All organs | <i>TPD52L1</i> | Tumor protein D52 like 1                             | 8.1E-130   |
| AR-Hs-All organs  | <i>MBOAT2</i>  | Membrane bound O-acyltransferase domain containing 2 | 2.2E-36    |
| GR-Mm-All organs  | <i>Ppp1r3c</i> | Protein phosphatase 1 regulatory subunit 3C          | 1.1E-15    |
|                   | <i>Ppp1r3b</i> | Protein phosphatase 1 regulatory subunit 3B          | 3.7E-4     |
| ERRs-Mm-metabolic | <i>Prkab2</i>  | Protein phosphatase 1 regulatory subunit 3A          | 1.8E-4     |
