# Supplementary material for: The Signaling Pathways Project: an integrated ‘omics knowledgebase for mammalian cellular signaling pathways
Source: bioRxiv or medRxiv preprint supplement (doi:10.1101/401729), 2019-06-03
Supplement: Supplementary file [file 401729-8.pdf]

**Supplementary Table S4. Q-PCR primers for consensome validation**

| ERs-Hs-mammary gland transcriptomic consensome |                                                       |
|------------------------------------------------|-------------------------------------------------------|
| <i>36B4</i>                                    | F: GGACATGTTGCTGGCCAATAA<br>R: GGGCCCGAGACCAGTGTT     |
| <i>ESR1</i>                                    | F: TGGAGATCTTCGACATGCTG<br>R: TCCAGAGACTTCAGGGTGCT    |
| <i>GREB1</i>                                   | F: TGGAAGGCTTGCAGCTCTTGAG<br>R: GGAAGGGCCGTGTAGCCTTCG |
| <i>TPD52L1</i>                                 | F: ACTCGGCATGAACCTGATGA<br>R: CTGCGTGA CT CAGGGTTTCA  |
| <i>CXCL12</i>                                  | F: ATTCTCAACTCCAACTGTGC<br>R: CTCAGCCGGGCTACAATCTG    |
| <i>MYBL1</i>                                   | F: GGCGAAGAGGTCGCGCAGTG<br>R: TGCCATCGATGCTGGCACTGAA  |
| <i>FHL2</i>                                    | F: ATCCAAGTGCCAGGAATGCA<br>R: GTGGCAGATGAAGCAGGTCT    |
| <i>RAB31</i>                                   | F: CCATCGCTGGAAACAAGTGC<br>R: AACCACGATGGCACCTATGG    |
| <i>NPY1R</i>                                   | F: CCACTCTCCTCTTGGTGCTG<br>R: TGGTTTCACTGGACCTGTACT   |
| <i>IL17RB</i>                                  | F: GCCCTTCCATGTCTGTGAAT<br>R: ACTGAAGCTCGCGTTTGT TT   |
| <i>CA12</i>                                    | F: GTGCTCCTGCTGGTGATCTT<br>R: TGGACCAGCTATTCTCCCCA    |
| <i>NRIP1</i>                                   | F: CCAGCCCAAATGAAGGTGC                                |

|                                             |                              |
|---------------------------------------------|------------------------------|
|                                             | R: GTTTGCTGGGTCTCTGCTCT      |
| <i>MYC</i>                                  | F: CTACCCTCTCAACGACAG        |
|                                             | R: TTCTTCCTCATCTTCTTGTTT     |
| <i>PRSS23</i>                               | F: AAACCCACTTGGCCTGCATA      |
|                                             | R: GGATGTAGATGCCACCTGC       |
| <i>TFF1</i>                                 | F: TCCCCTGGTGCTTCTATCCTAATAC |
|                                             | R: GCAGTCAATCTGTGTTGTGAGCC   |
| <i>STC2</i>                                 | F: GACCGACGCCACCAACCCAC      |
|                                             | R: CCCACATCGCCAGCGTTGA       |
| <i>SLC7A5</i>                               | F: GCCTACTTCACCACCCTGTC      |
|                                             | R: AAGACGGGGATGATCCAGGA      |
| <i>EGR3</i>                                 | F: CATGTGCGGCGTGGAGTC        |
|                                             | R: TAGGTCACGGTCTTGTTGCC      |
| <i>PTGES</i>                                | F: CAGTATTGCAGGAGCGACCC      |
|                                             | R: GACGAAGCCCAGGAAAAGGA      |
| GR-mouse-liver<br>transcriptomic consensome |                              |
| <i>Ppp1r3b</i>                              | F: TGAGCCACAGATTGCTGGAG      |
|                                             | R: TGGATGTCCACAGCCATCAC      |
| <i>Ppp1r3c</i>                              | F: TGATCCATGTGCTAGATCCACG    |
|                                             | R: ACTCTGCGATTTGGCTTCCTG     |
| <i>Pcx</i>                                  | F: GGCTGCAGCAAGTTTGGTTG      |
|                                             | R: TAGATGTTAGCTCCGCCCTG      |
| <i>Fgf21</i>                                | F: AGCATACCCCATCCCTGACT      |
|                                             | R: AAGAGACTTTCTGGACTGCG      |
| <i>Rplp0</i>                                | F: GAAACTGCTGCCTCACATCCG     |
|                                             | R: GCTGGCACAGTGACCTCACAG     |

---
